# Supplementary material for: Bio-based adenine-containing copolyimides with high switching temperatures and high-strain storage
Source: Royal Society of Chemistry journal article supplement (doi:10.1039/d2me00031h), 2022-01-01
Supplement: d2me00031h1.pdf [file d2me00031h1.pdf]

## Supporting Information

### Bio-based Adenine-containing Copolyimides with High Switching Temperature and Storing High Strains

Wei Tan<sup>‡</sup>, Jiangbo Lv<sup>‡</sup>, Renke Li, Jianghuai Hu, Ke Zeng\* and Gang Yang\*

State Key Laboratory of Polymer Materials Engineering, College of Polymer Science and Engineering, Sichuan University, Chengdu, 610065, P. R. China

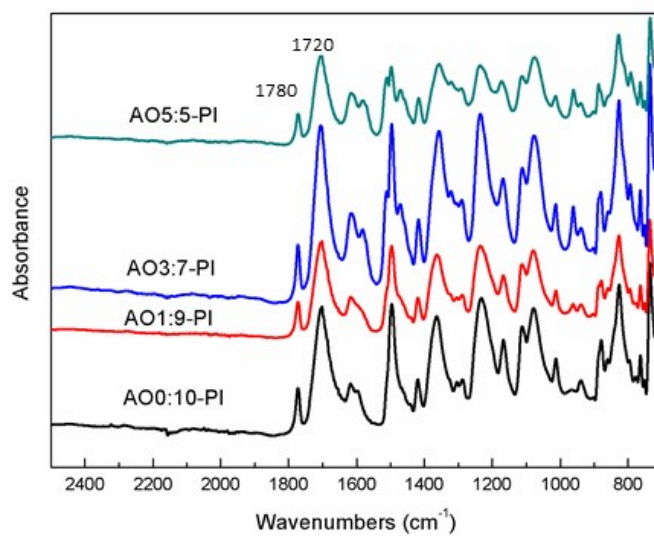

Fig. S1. ATR-FTIR of poly(adenine-co-imide)s films

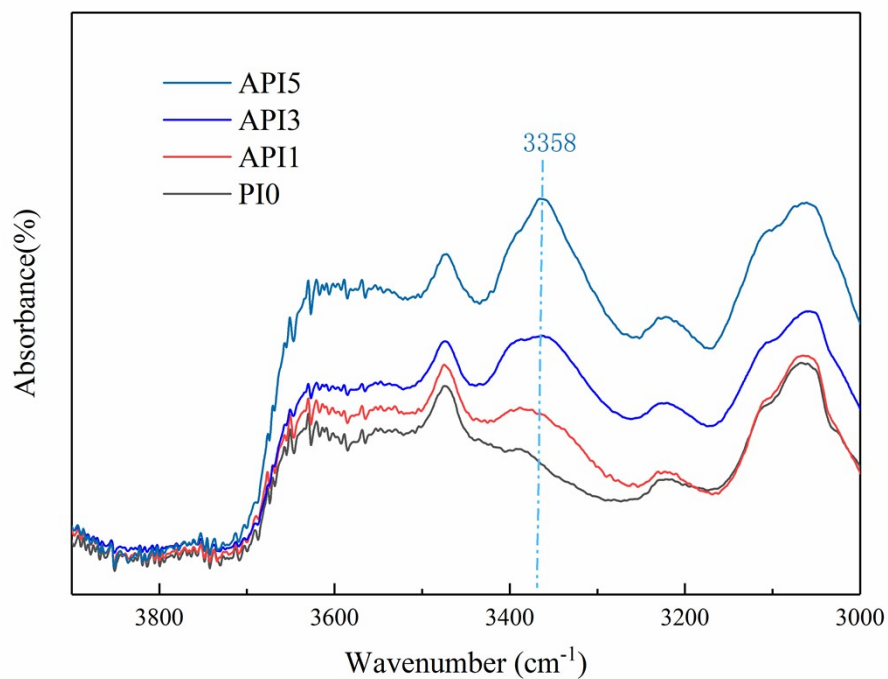

**Fig. S2.** The ATR-FTIR between 3000-3900 $\text{cm}^{-1}$  of poly(adenine-co-imide)s films

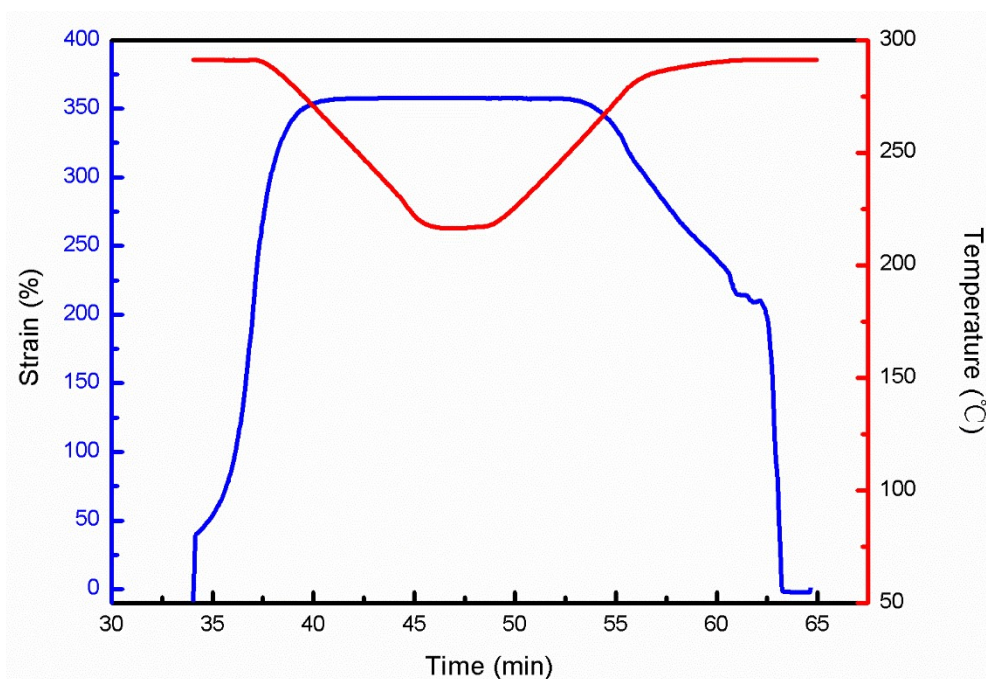

**Fig. S3.** Shape memory cycle for API3 of 2d plot corresponding to Figure 3C

**Table S1.** Tensile strain ( $\epsilon$ ), shape fixity (Rf), shape recovery (Rr) and trigger temperature of API3 over four consecutive shape memory cycles

|                                 |                | Cycle 1 | Cycle 2 | Cycle 3 | Cycle 4 |
|---------------------------------|----------------|---------|---------|---------|---------|
|                                 | $\epsilon$ (%) | 141     | 142     | 142     | 142     |
|                                 | Rf(%)          | 99      | 99      | 99      | 99      |
|                                 | Rr(%)          | 100     | 100     | 100     | 100     |
| Trigger-<br>temperature<br>(°C) | Starting-      | 266     | 266     | 269     | 269     |
|                                 | Ending-        | 288     | 288     | 289     | 289     |
|                                 | Average-       | 277     | 277     | 279     | 279     |

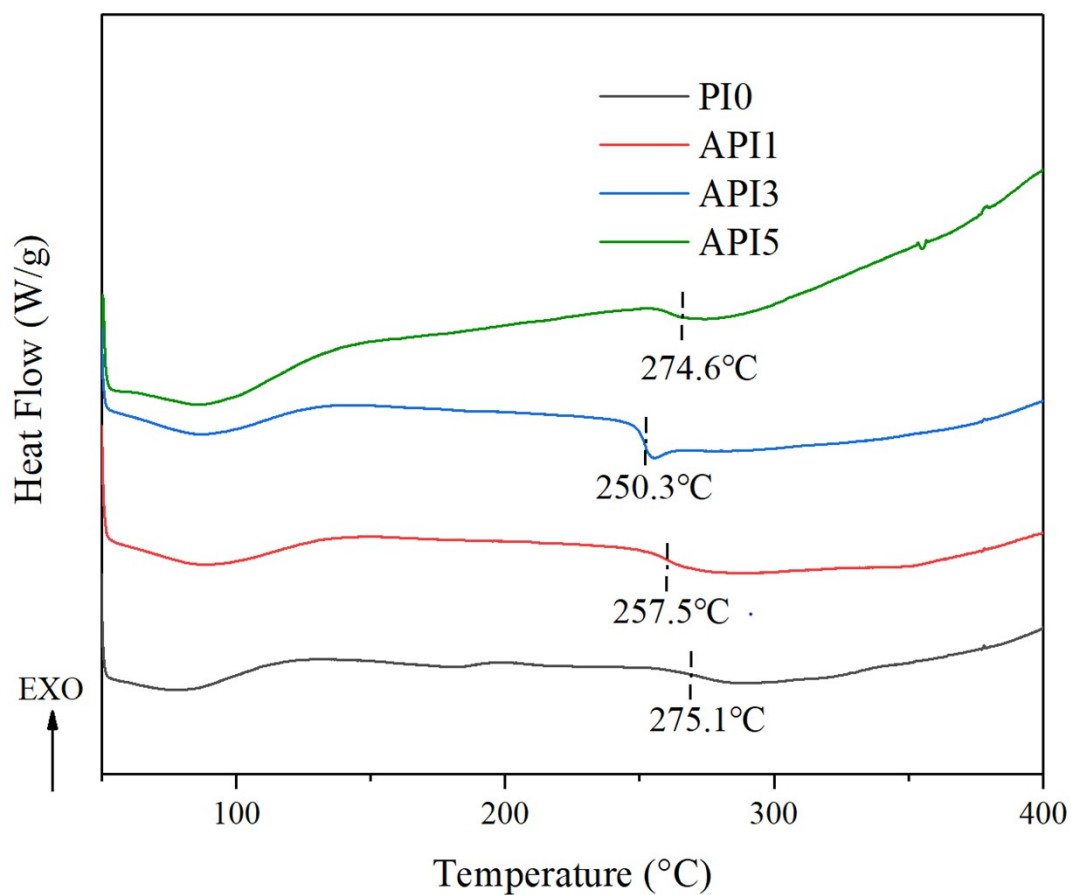

Fig. S4. DSC of the copolyimides (10°C/min, N<sub>2</sub>)

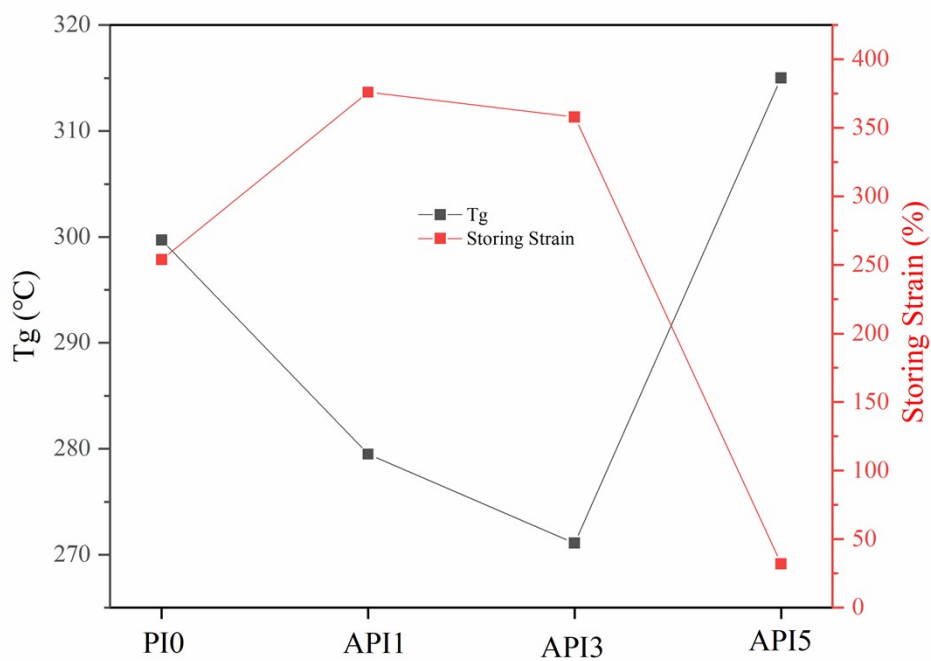

Fig. S5. Glass transition temperature (Tg) and storing strain of PI0, API1, API3, API5.

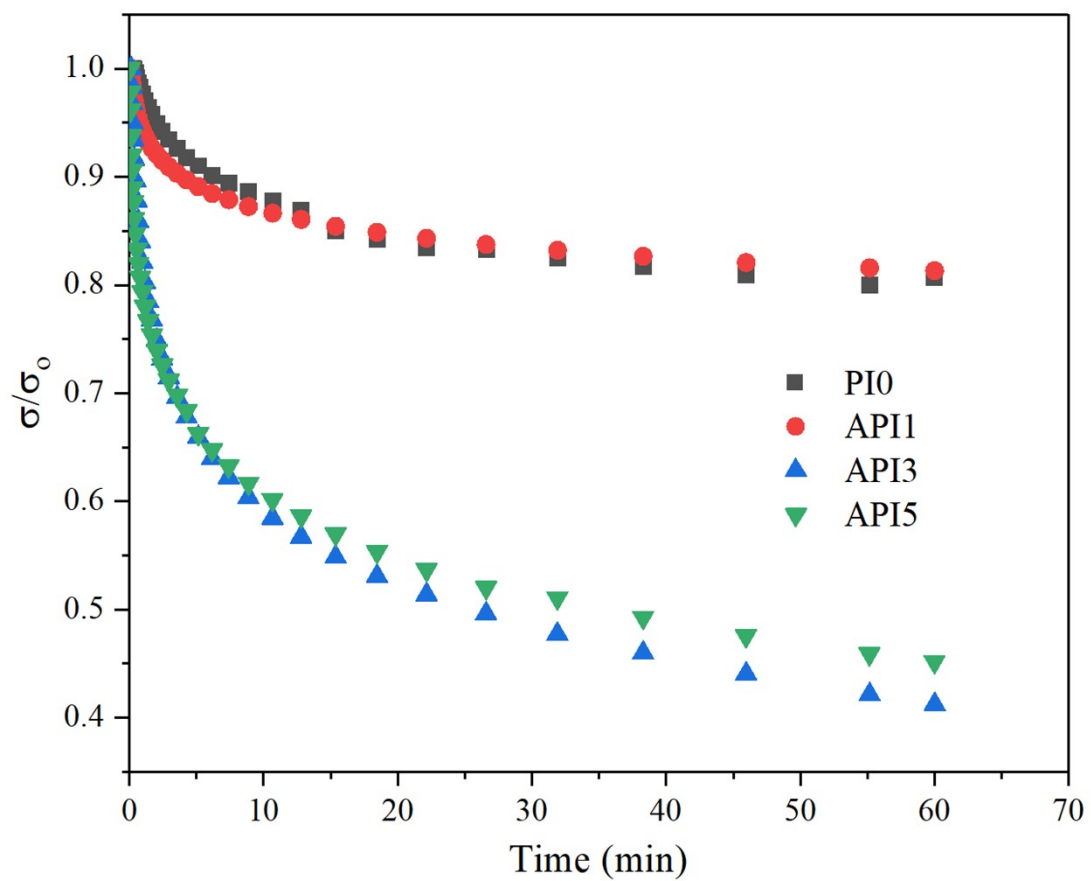

**Fig. S6.** Stress relaxation of copolyimides in  $T_g+20^\circ\text{C}$ .
